## Characteristics of a new subgroup in chronic heart failure: heart failure with mid-range ejection fraction (HFmrEF)

University Hospital (UZ) Brussels, Brussels, Belgium

**Purpose:** The goal of this study is to characterize and compare this subgroup (HFmrEF) to the other two subgroups (HFpEF and HFrEF). Secondly, mortality rates were studied and compared, depending on LVEF classification and global longitudinal strain (GLS).

**Results:** HFmrEF significantly differed from HFpEF concerning the following parameters: higher prevalence of male gender and ischemic aetiology, lower prevalence of valvular and hypertensive aetiology, more dilated left ventricles and higher usage of ACE inhibitors and beta-blockers. HFmrEF was similar to HFpEF concerning older age, high prevalence of tachyarrhythmia, low use of device therapy and aldosterone antagonists.

The survival rate after 853 days was 81,6% in HFref, 76,3% in HFmrEF and 81,1% in HFpEF ( $p = 0,634$ ). When looking at the whole patient population, the Kaplan Meier estimation was significant ( $p < 0,001$ ) with a survival rate after 853 days of 33,3% for the group with lower absolute values than 6,3% for GLS and 85% for group with higher absolute strain values.

**Conclusion:** Patients with HFmrEF didn't really differentiate as one class apart from HFREF or HFpEF, but some characteristics were similar to HFREF, and some others to HFpEF. Finally some characteristics of HFmrEF were more in a grey zone with none of the characteristics of both HFREF nor HFpEF.

The all cause survival rate in 853 days among the 3 LVEF based groups, were quite similar. While the Kaplan Meier estimation indicated a lot higher mortality when GLS>-6.3% compared to GLS <-6.3%.

Classifying chronic HF patients is probably more complex than simply stratifying patients by LVEF cut-off values. One must not forget to take comorbidities and aetiology in mind while managing heart failure.

Abstract P1584 Figure. Aetiology in LVEF based groups

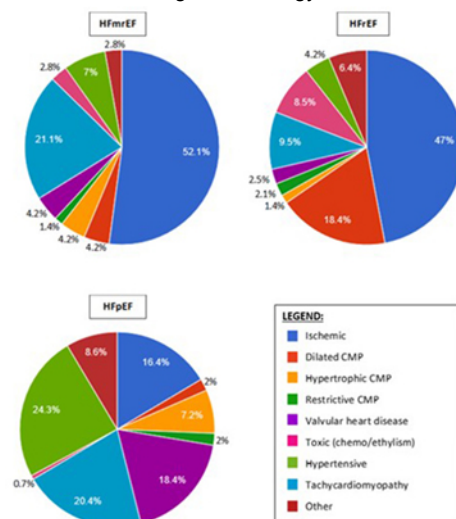

Source: http://academic.oup.com/ehjcimaging/article-pdf/21/Supplement_1/jez319.1004/31866272/jez319.1004.pdf
